# Supplementary material for: Selecting Appropriate Sarcopenia Screening Methods for Asian Populations
Source: J Clin Med. 2020 Jul 22;9(8):2333. doi: 10.3390/jcm9082333 (PMC7464734; doi:10.3390/jcm9082333)
Supplement: Supplementary file 1 [file jcm-09-02333-s001.pdf]

**Supplementary Table S1.** Age-based differences in body composition

| Age group<br>(yr) | <i>n</i> | Weight<br>(kg) | TBM<br>(kg) | TFM<br>(kg)  | TLM<br>(kg)  | ASM<br>(kg)  | hSMI<br>(kg/m <sup>2</sup> ) |
|-------------------|----------|----------------|-------------|--------------|--------------|--------------|------------------------------|
| Men               | 3028     |                |             |              |              |              |                              |
| 20-29             | 77       | 73.08 (11.20)  | 3.07 (0.43) | 17.89 (7.74) | 52.17 (5.03) | 24.32 (2.68) | 8.04 (0.82)                  |
| 30-39             | 492      | 75.16 (12.78)  | 2.95 (0.43) | 20.61 (7.71) | 51.59 (6.32) | 23.67 (3.11) | 7.94 (0.86)                  |
| 40-49             | 840      | 73.70 (10.49)  | 2.88 (0.39) | 19.41 (6.58) | 51.44 (5.37) | 23.36 (2.90) | 7.95 (0.83)                  |
| 50-59             | 1014     | 71.73 (9.71)   | 2.81 (0.41) | 18.69 (5.79) | 50.26 (5.29) | 22.33 (2.76) | 7.79 (0.79)                  |
| 60-69             | 481      | 70.01 (10.40)  | 2.77 (0.41) | 18.32 (6.14) | 48.86 (5.59) | 21.47 (2.85) | 7.62 (0.81)                  |
| 70+               | 124      | 66.32 (8.74)   | 2.61 (0.43) | 18.11 (5.53) | 45.42 (4.77) | 19.40 (2.52) | 7.09 (0.72)                  |
| Women             | 2853     |                |             |              |              |              |                              |
| 20-29             | 134      | 55.70 (10.78)  | 2.30 (0.29) | 18.24 (7.20) | 35.02 (4.58) | 15.28 (2.33) | 5.92 (0.80)                  |
| 30-39             | 556      | 55.47 (8.89)   | 2.30 (0.32) | 18.38 (6.30) | 34.64 (3.79) | 14.82 (2.09) | 5.73 (0.68)                  |
| 40-49             | 822      | 57.15 (8.60)   | 2.29 (0.31) | 19.65 (5.86) | 34.91 (3.78) | 14.78 (1.87) | 5.83 (0.65)                  |
| 50-59             | 889      | 57.86 (9.10)   | 2.14 (0.32) | 20.84 (6.31) | 34.53 (3.93) | 14.37 (1.92) | 5.83 (0.69)                  |
| 60-69             | 347      | 57.61 (9.12)   | 1.97 (0.32) | 21.08 (6.22) | 34.11 (4.06) | 14.10 (2.00) | 5.89 (0.70)                  |
| 70+               | 105      | 58.01 (8.81)   | 1.90 (0.34) | 21.69 (6.19) | 33.95 (3.80) | 13.68 (1.80) | 5.84 (0.65)                  |

*continued*

| wSMI<br>(%)  |
|--------------|
| 33.65 (3.57) |
| 31.82 (3.31) |
| 31.93 (3.15) |
| 31.30 (2.88) |
| 30.86 (2.82) |
| 29.37 (2.72) |
|              |
| 27.73 (2.92) |
| 26.93 (2.87) |
| 26.08 (2.65) |
| 25.07 (2.86) |
| 24.69 (2.78) |
| 23.81 (2.70) |

Except for *n*, values are given as mean (standard deviation). *n*, number; TBM, total bone mass; TFM, total fat mass; TLM, total lean mass; ASM, appendicular skeletal muscle was calculated by summing the lean mass amounts of the four extremities; hSMI, height-adjusted skeletal muscle index; wSMI, weight-adjusted skeletal muscle index.

**Supplementary Table S2** Prevalence of low skeletal mass (Class I and Class II) in a healthy population using two adjustment indices

|          | hSMI   |         |          | wSMI   |         |          |
|----------|--------|---------|----------|--------|---------|----------|
|          | Normal | Class I | Class II | Normal | Class I | Class II |
| Men      |        |         |          |        |         |          |
| 20-29 yr | 87.0%  | 11.7%   | 1.3%     | 84.4%  | 11.7%   | 3.9%     |
| 30-39 yr | 81.3%  | 15.7%   | 3.0%     | 73.0%  | 21.5%   | 5.5%     |
| 40-49 yr | 83.1%  | 14.6%   | 2.3%     | 74.2%  | 22.3%   | 3.6%     |
| 50-59 yr | 76.7%  | 19.7%   | 3.6%     | 67.4%  | 28.2%   | 4.4%     |
| 60-69 yr | 68.6%  | 26.0%   | 5.4%     | 61.3%  | 32.4%   | 6.2%     |
| 70+ yr   | 45.2%  | 36.3%   | 18.5%    | 36.3%  | 51.6%   | 12.1%    |
| Women    |        |         |          |        |         |          |
| 20-29 yr | 88.1%  | 11.9%   | 0.0%     | 85.1%  | 11.9%   | 3.0%     |
| 30-39 yr | 83.8%  | 15.5%   | 0.7%     | 77.0%  | 19.2%   | 3.8%     |
| 40-49 yr | 87.8%  | 11.9%   | 0.2%     | 69.3%  | 26.2%   | 4.5%     |
| 50-59 yr | 87.2%  | 11.8%   | 1.0%     | 53.5%  | 36.2%   | 10.2%    |
| 60-69 yr | 85.9%  | 13.5%   | 0.6%     | 49.0%  | 36.6%   | 14.4%    |
| 70+ yr   | 91.4%  | 8.6%    | 0.0%     | 32.4%  | 41.9%   | 25.7%    |

hSMI, height-adjusted skeletal muscle index; wSMI, weight-adjusted skeletal muscle index.

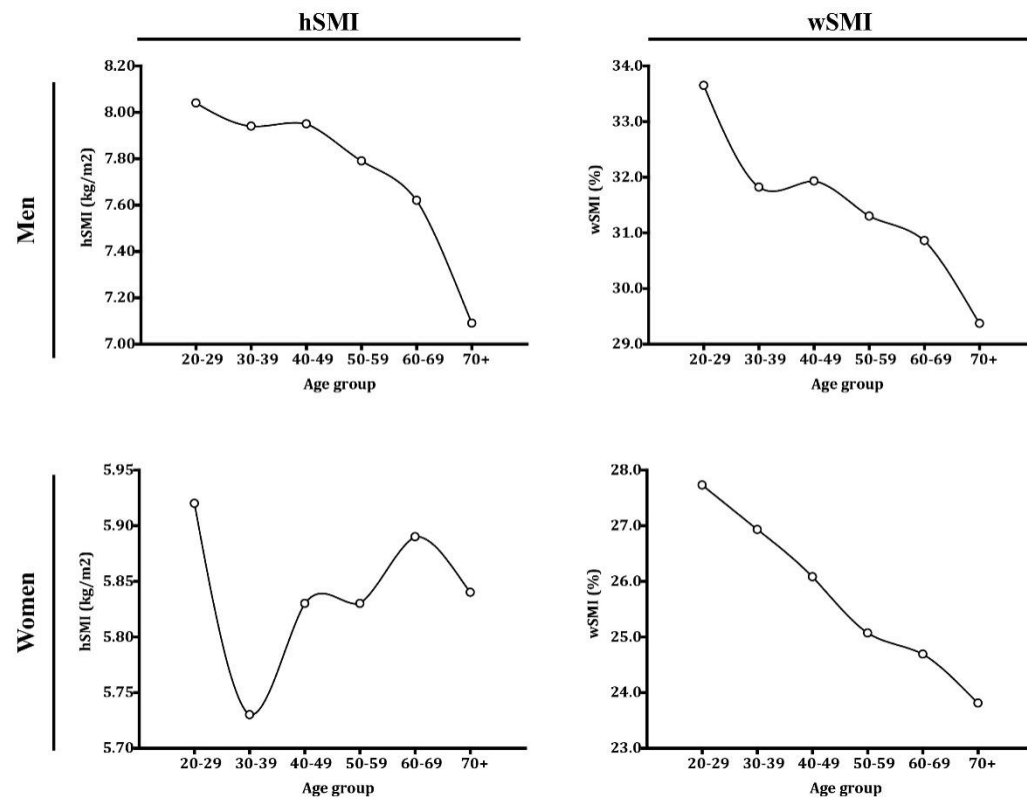

**Supplementary Figure S1.** Age-based differences in two adjustment indices in a healthy control population. hSMI, height-adjusted skeletal muscle index; wSMI, weight-adjusted skeletal muscle index

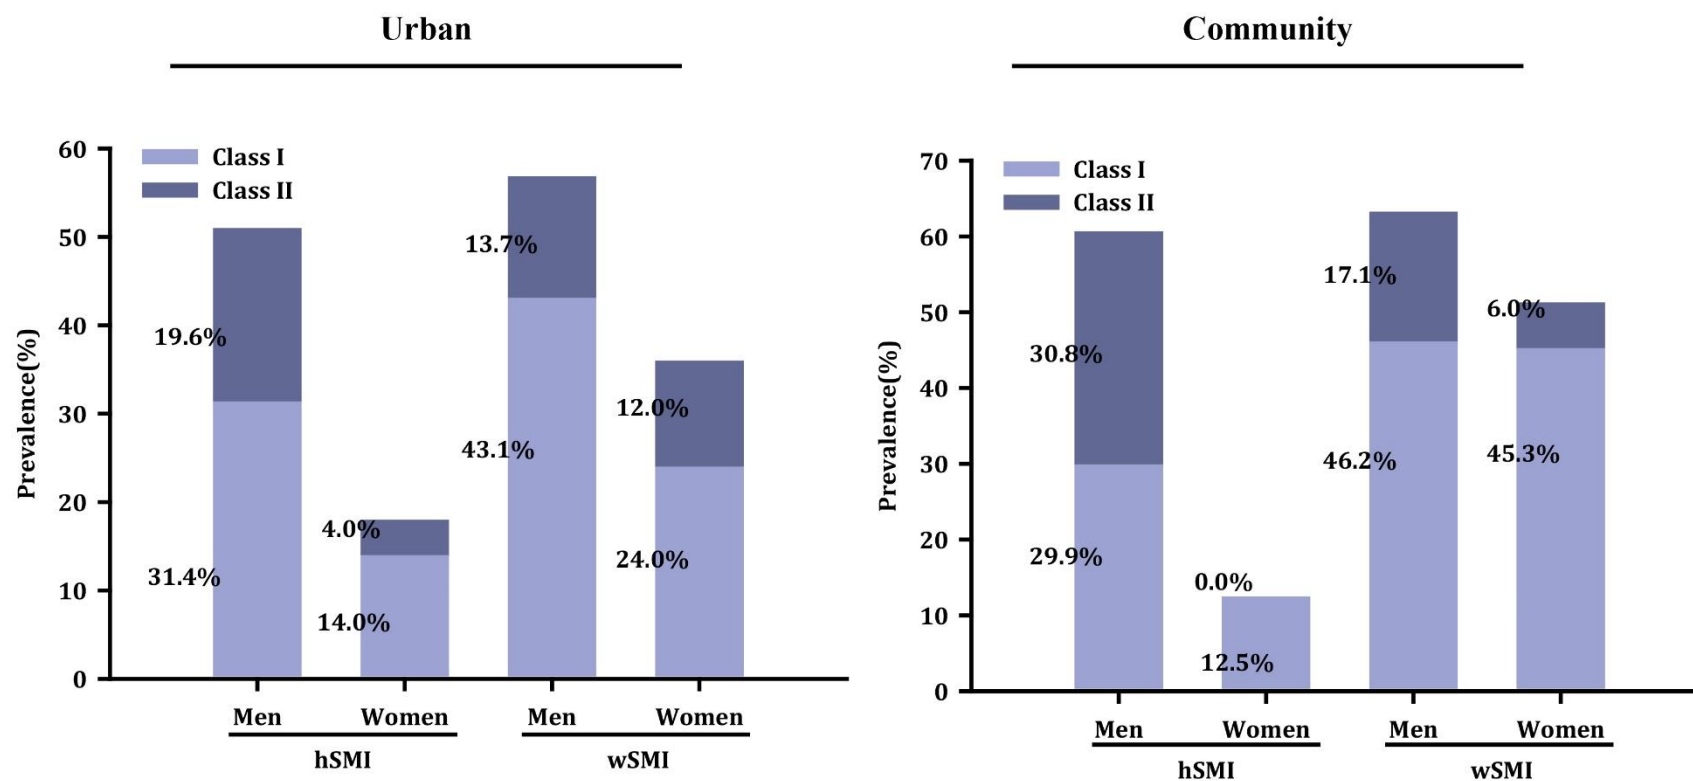

**Supplementary Figure S2.** Prevalence of low skeletal mass (Class I and Class II) using two adjustment indices in urban and community-based populations. hSMI, height-adjusted skeletal muscle index; wSMI, weight-adjusted skeletal muscle index
